# Supplementary material for: T Cells Expressing Checkpoint Receptor TIGIT Are Enriched in Follicular Lymphoma Tumors and Characterized by Reversible Suppression of T-cell Receptor Signaling
Source: Oxford University Press journal article supplement (doi:10.1158/1078-0432.ccr-17-2337), 2017-12-07
Supplement: 10780432ccr172337-sup-187656_2_supp_4391014_5z5ppc.pdf [file 10780432ccr172337-sup-187656_2_supp_4391014_5z5ppc.pdf]

# Supplementary Figure 1

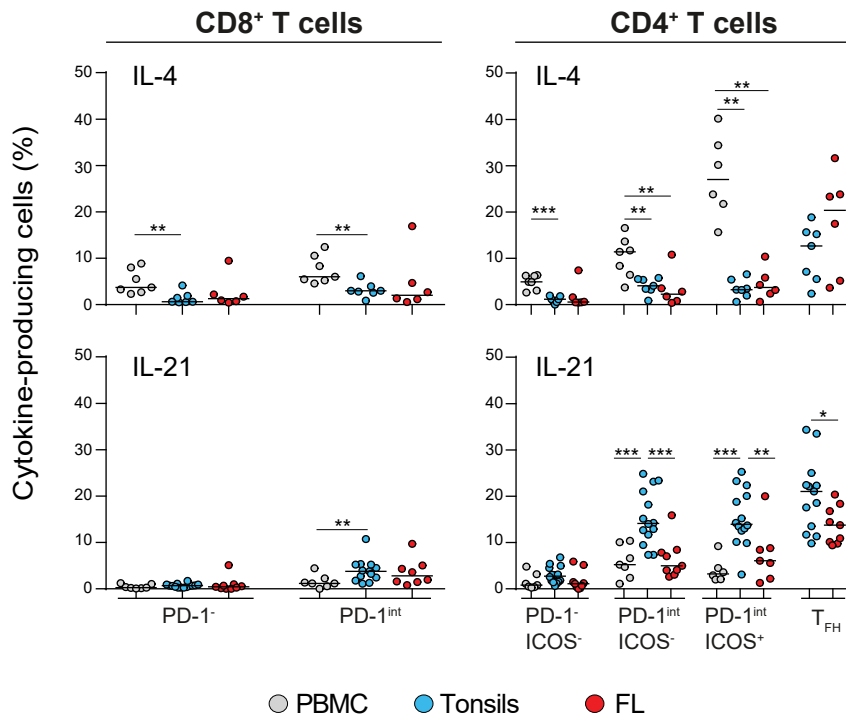

**Supplementary Figure 1. IL-21 production is reduced in CD4 FL T cells.** Single cell suspensions from FL LN and healthy donors (tonsils and PBMC) were cultured with or without PMA and ionomycin for a total of 6 hours, with GolgiPlug present for the last 4 hours. Levels of intracellular IL-4 and IL-21 were measured by fluorescence flow cytometry. Each data point represents a single donor. Statistical differences were calculated using Mann-Whitney non-parametric test; \* $p < 0.05$ , \*\* $p < 0.01$ , \*\*\* $p < 0.001$ .

# Supplementary Figure 2

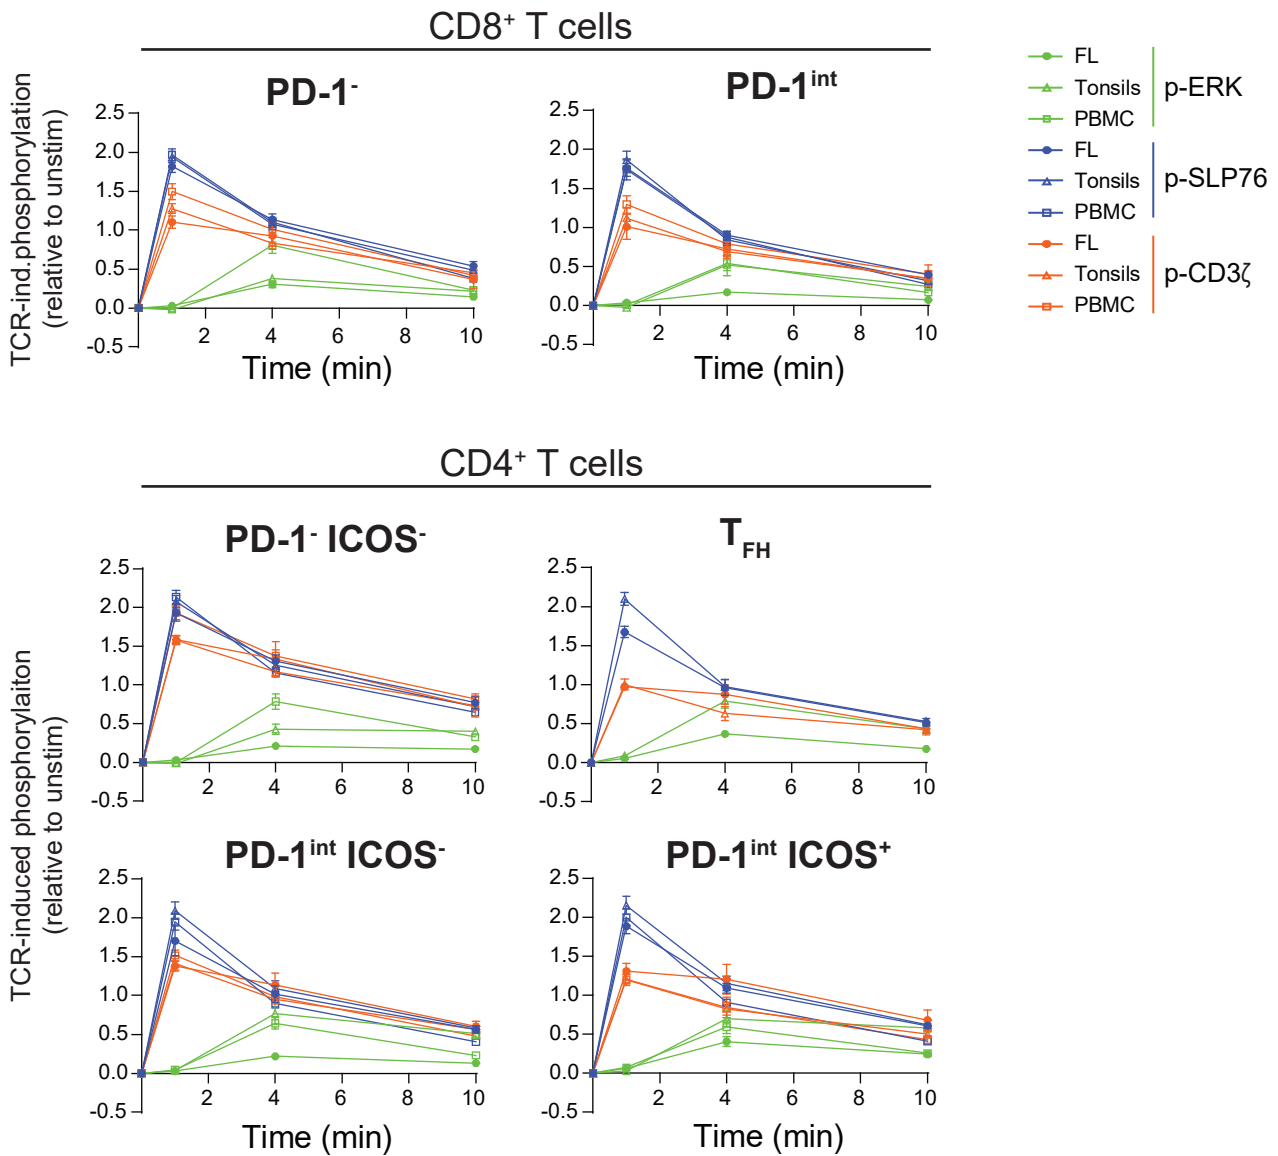

**Supplementary Figure 2. TCR-induced signaling effectors have different kinetic.** Single cell suspensions from FL LN ( $n = 9$ ), tonsils ( $n = 11$ ) and PBMC ( $n = 9$ ) were cultured with or without  $\alpha$ -CD3+ $\alpha$ -CD28 antibodies for 2 minutes, followed by avidin crosslinking for 1, 4 or 10 minutes and then assayed for TCR-induced phosphorylation of CD3 $\zeta$ , SLP76 and ERK using phospho-flow cytometry. Diagrams show kinetic of the three signaling effectors in CD8 and CD4 T-cell subsets as median fold change (FC) induction relative to unstimulated cells. Mean FC  $\pm$  SEM.

## Supplementary Figure 3

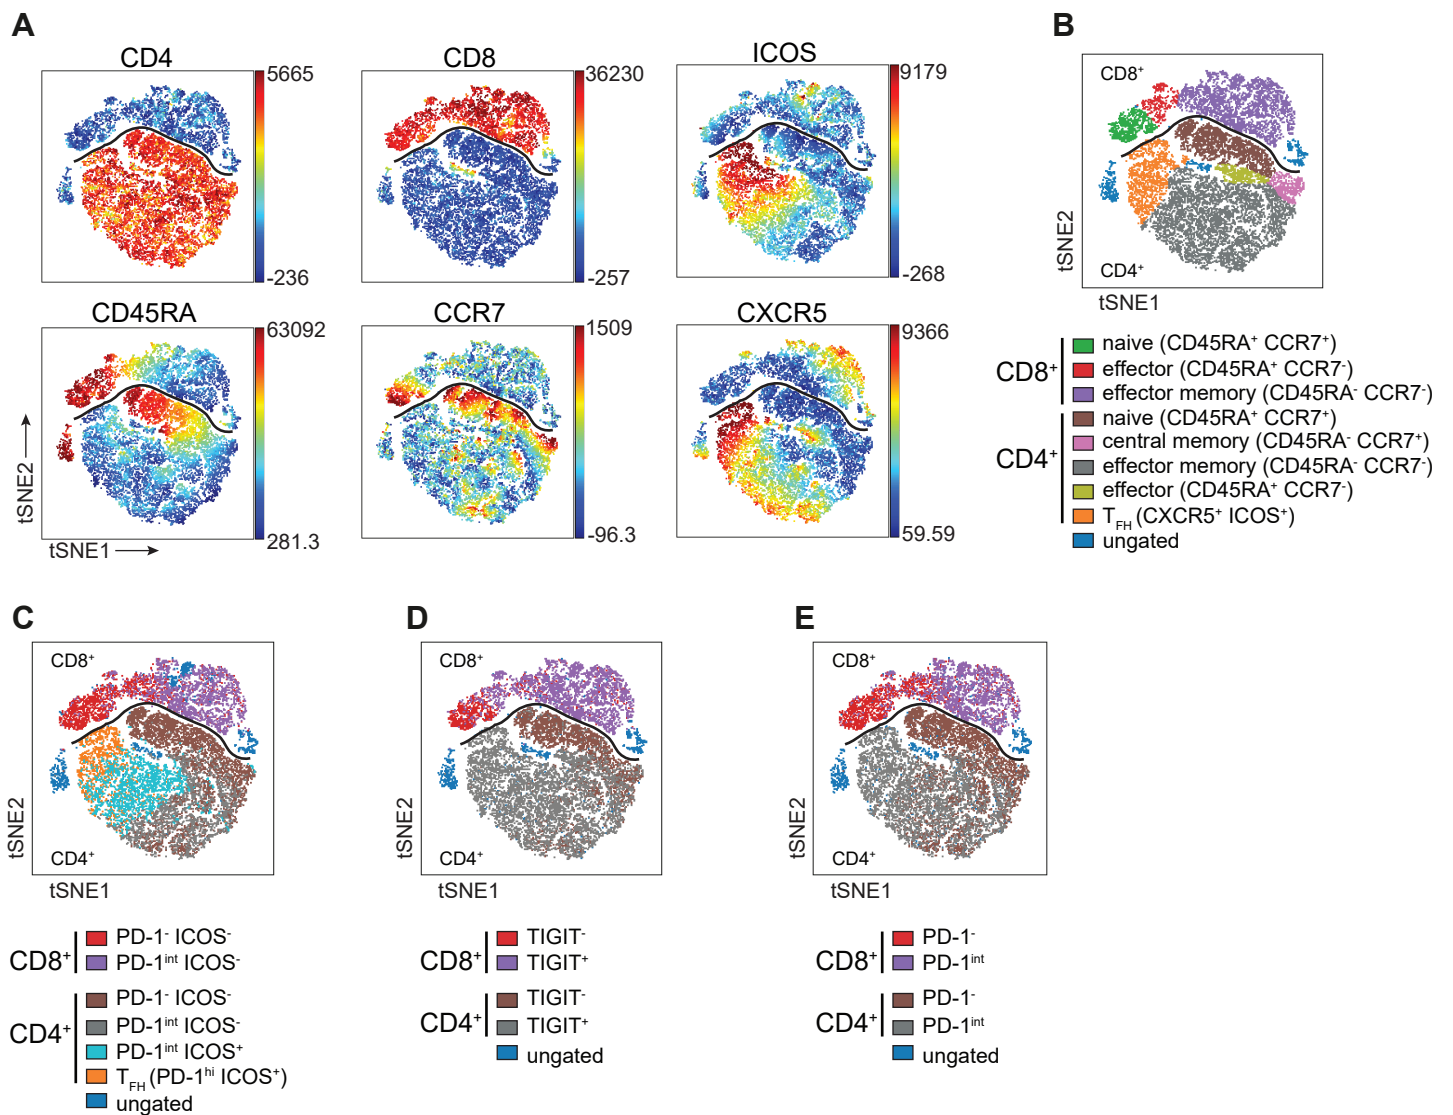

**Supplementary Figure 3. Identification of T-cell subsets.** Single cell suspensions from FL were analyzed by fluorescence flow cytometry. A viSNE analysis was performed on the CD3<sup>+</sup> cells, based on expression of CD4, CD8, CXCR5, ICOS, CD45RA and CCR7. Figure shows viSNE map of 4 FL samples combined. The manually added line in the viSNE plots marks the distinction between CD8 and CD4 T cells. Color represents fluorescence intensity with separate scale for each marker, with max set to highest measured signal. **(A)** Intensity of markers included in viSNE analysis and used for gating of conventional T-cell subsets (corresponding to subsets used in Figure 4). **(B)** Each gated T-cell subset, identified in (A), is shown with a separate color. **(C)** T-cell subsets were gated on biaxial plots based on expression of PD-1 and ICOS as in Figure 1, and shown on the viSNE map. **(D)** T cells were gated on biaxial plots based on expression of CD4/CD8 and TIGIT and shown on viSNE map. **(E)** T cells were gated on biaxial plots based on expression of CD4/CD8 and PD-1 and shown on viSNE map.

## Supplementary Figure 4

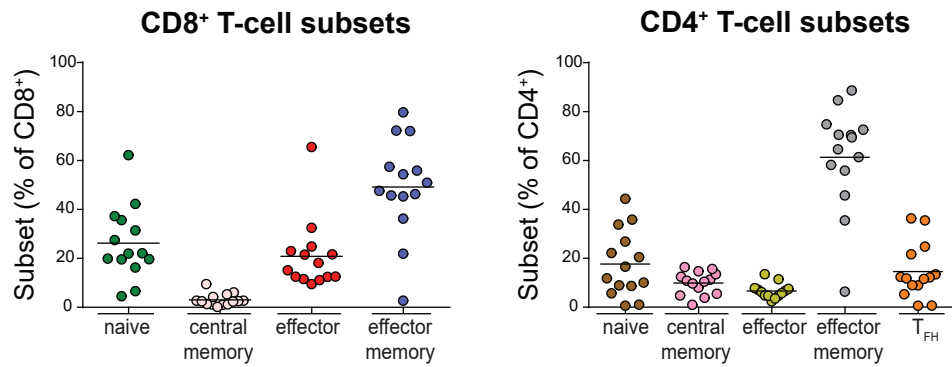

**Supplementary Figure 4. Distribution of T-cell subsets in FL LN.** Single cell suspensions from FL LN ( $n = 14$ ) were analyzed by fluorescence flow cytometry. Conventional subsets of naive T cells, T central memory cells, T effector cells, T effector memory cells and T follicular helper cells (T<sub>FH</sub>) were gated on biaxial plots, based on differential expression of CD4, CD8, CXCR5, ICOS, CD45RA and CCR7. Each data point represents a single donor.

# Supplementary Figure 5

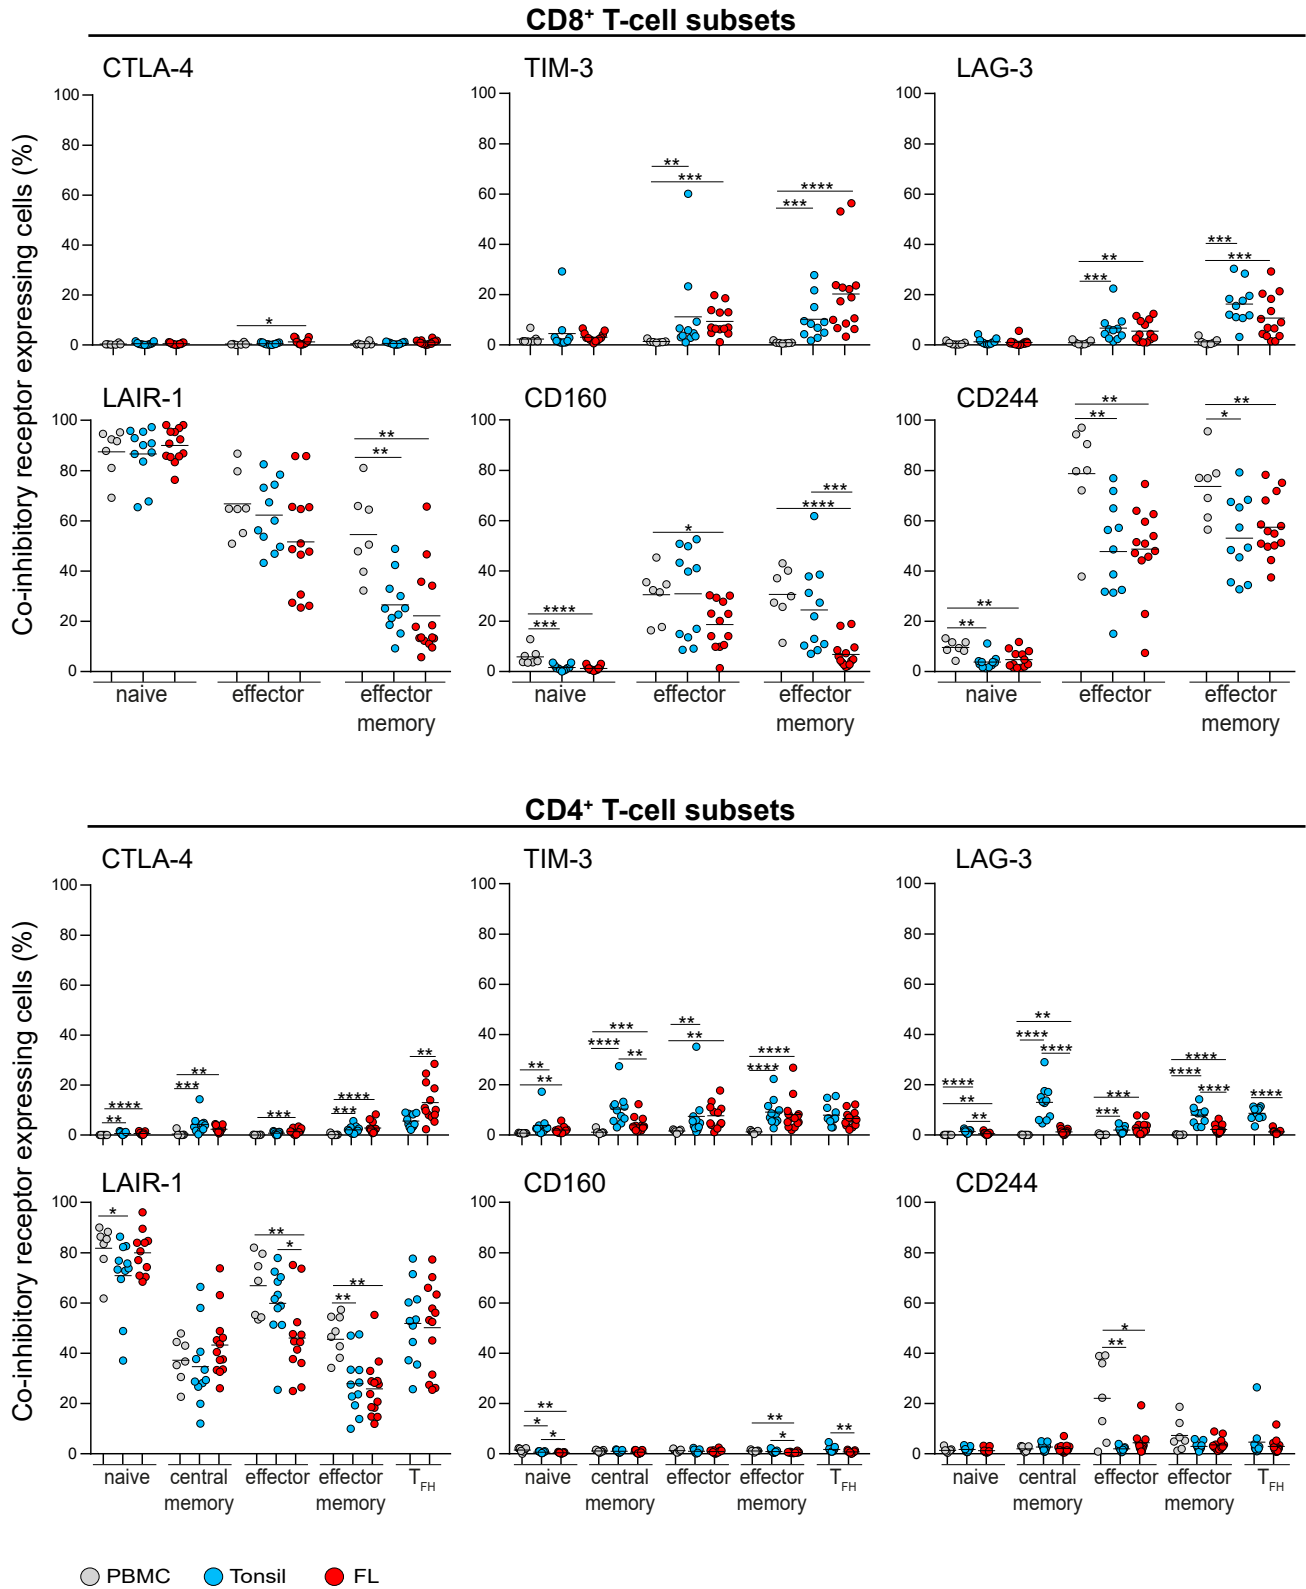

**Supplementary Figure 5. Expression patterns of co-inhibitory receptors in CD8 and CD4 T-cell subsets.** Co-Inhibitory receptor expression was analyzed by 11-parameter flow cytometry in single cell suspensions from FL LN and non-tumoral controls (tonsils and PBMC). Each data point represents a single donor. Statistical differences were calculated using Mann-Whitney non-parametric test \* $p < 0.05$ , \*\* $p < 0.01$ , \*\*\* $p < 0.001$ , \*\*\*\* $p < 0.0001$ .

## Supplementary Figure 6

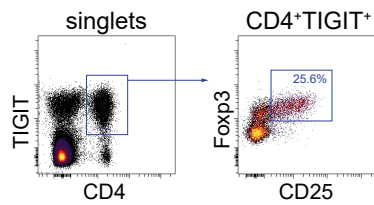

### Supplementary Figure 6. Contribution of Tregs among CD4<sup>+</sup>TIGIT<sup>+</sup> T cells

Single cell suspensions were analyzed by flow cytometry. Plots show one representative FL sample.

**Supplementary Figure 7**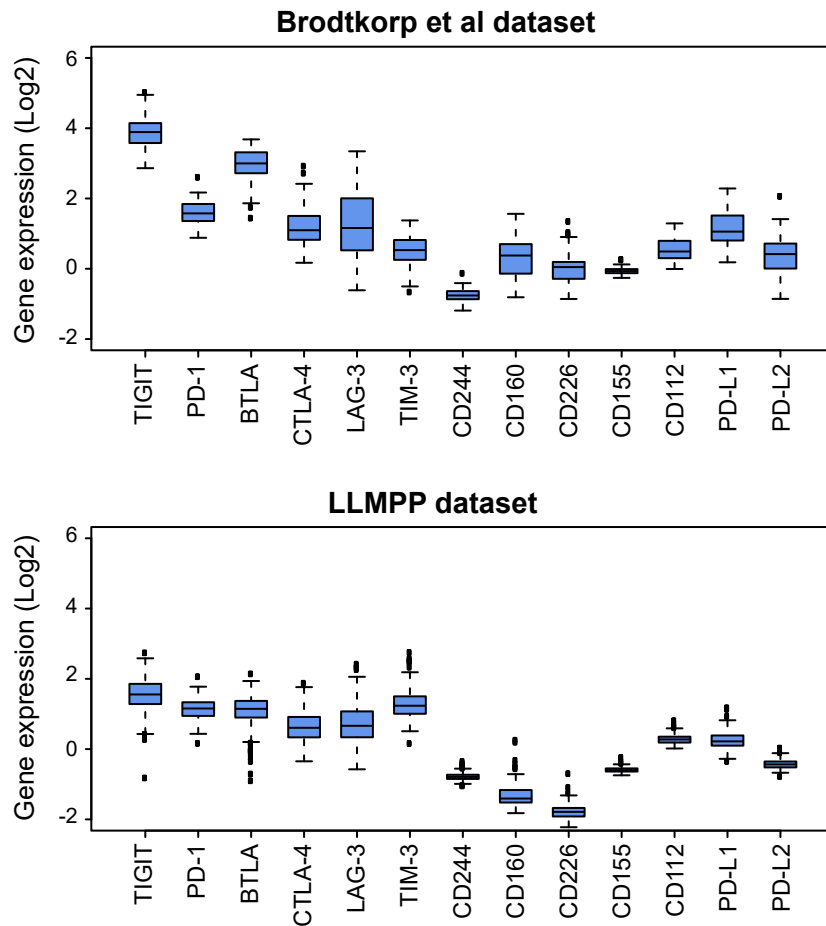**Supplementary Figure 7. TIGIT is a highly expressed co-inhibitory receptor in FL.**

Boxplots represent gene expression in 44 pre-treatment FL biopsies (Brodtkorb et al.) (upper panel), and 194 pre-treatment FL biopsies (Dave et al.) (lower panel). Values are median-centered across patients.

## Supplementary Figure 8

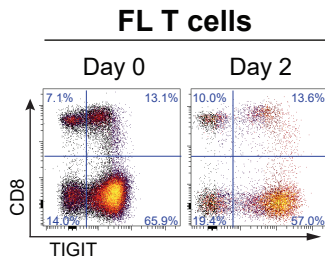

### Supplementary Figure 8. TIGIT expression is stable over time.

Single cell suspensions from FL LN were analyzed by flow cytometry. TIGIT expression was measured at day 0 and after 48 h *in vitro* culture.



## Supplementary Figure 9

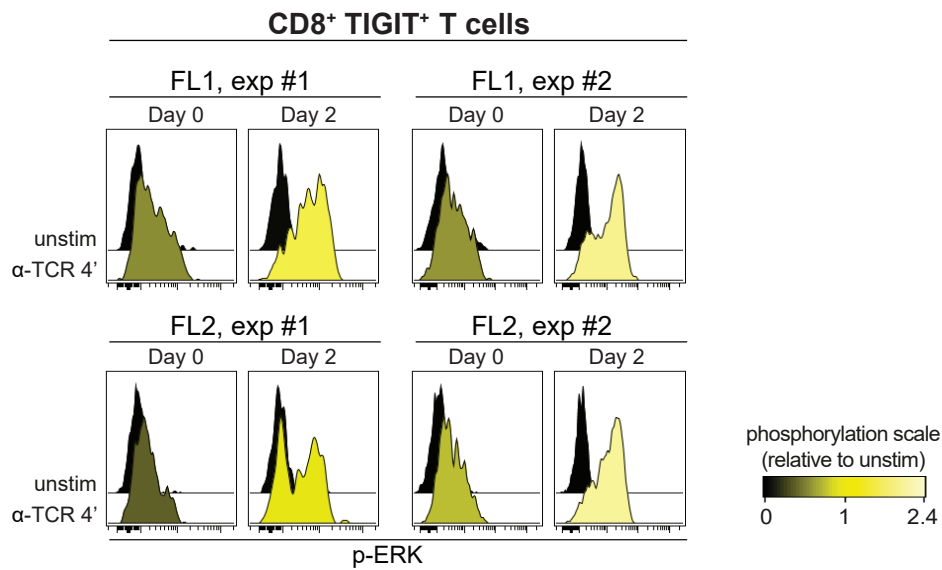**Supplementary Figure 9. Recovery of TCR-induced signaling in TIGIT<sup>+</sup> CD8<sup>+</sup> FL T cells is robust.**

Single cell suspensions from FL LN were assayed for TCR-induced signaling and analyzed by phospho-flow cytometry at day 0 and after 48 hour *in vitro* culture. Signaling was induced using α-CD3+α-CD28 antibodies for 2 minutes, followed by avidin crosslinking for 4 minutes. The same FL specimens ( $n = 2$ ) were analyzed in two separate experiments. The histograms show median fold change (FC) induction relative to unstimulated cells, using arcsinh transformed data.
